# Supplementary material for: Quantitative phosphoproteomics reveals GSK3A substrate network is involved in the cryodamage of sperm motility
Source: PubMed Central journal article supplement (PMC8521533; doi:10.1042/bsr20211326), 2021-10-12
Supplement: BSR-2021-1326_supp.pdf [file BSR-2021-1326_supp.pdf]

**A. Before cryopreservation**

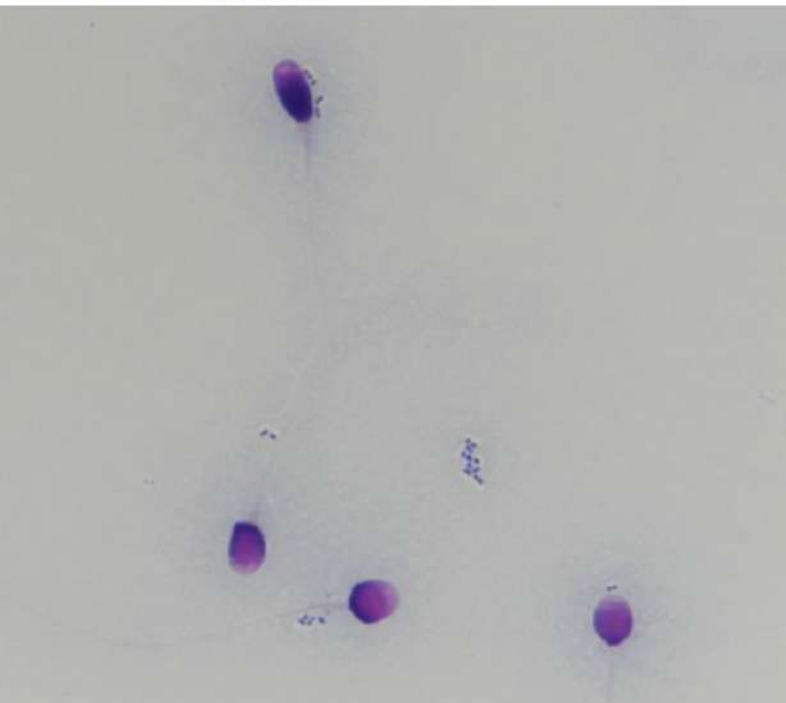

**B. After cryopreservation**

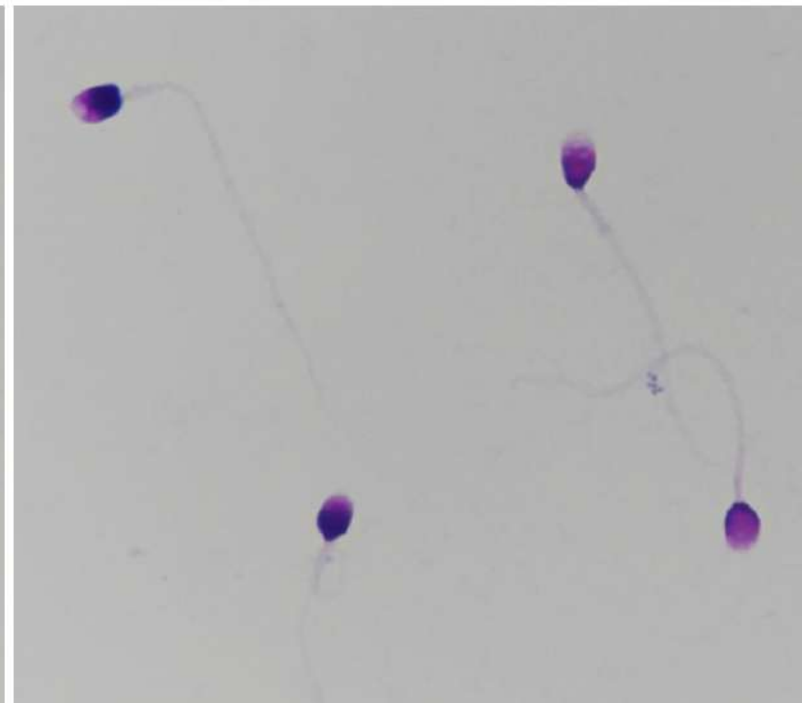

A

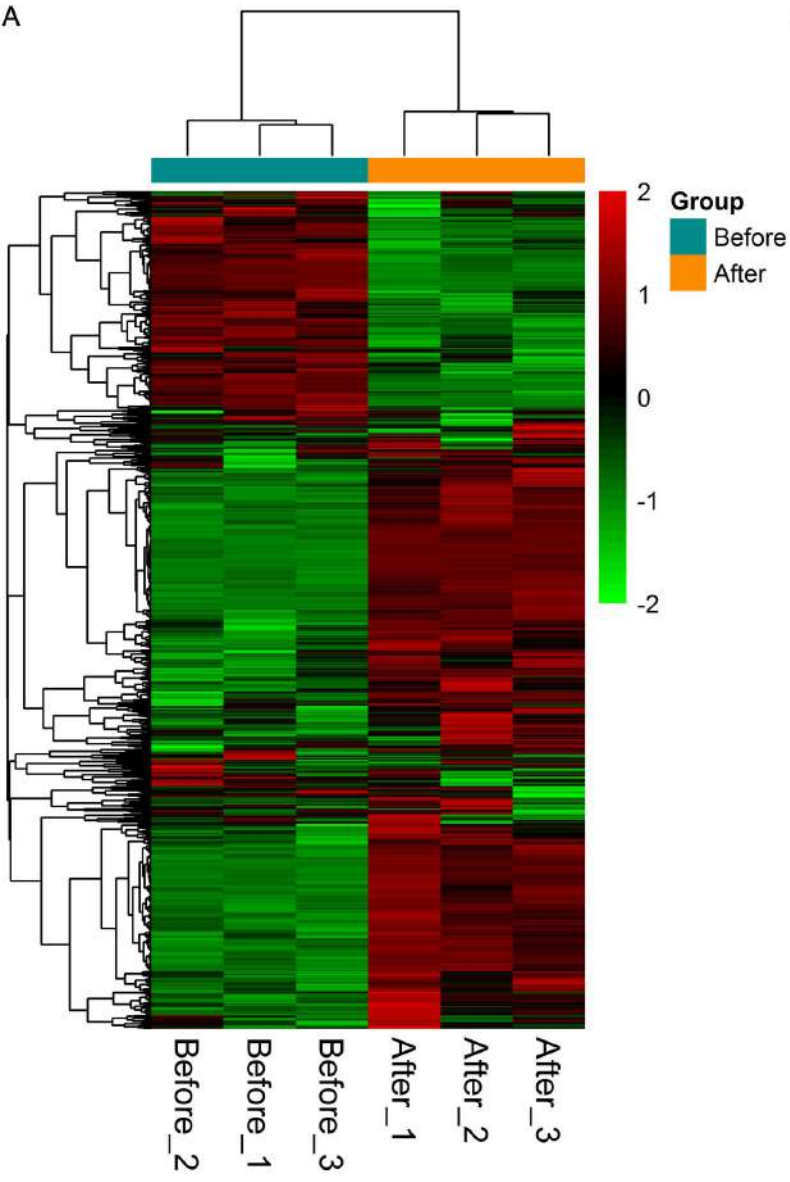

B

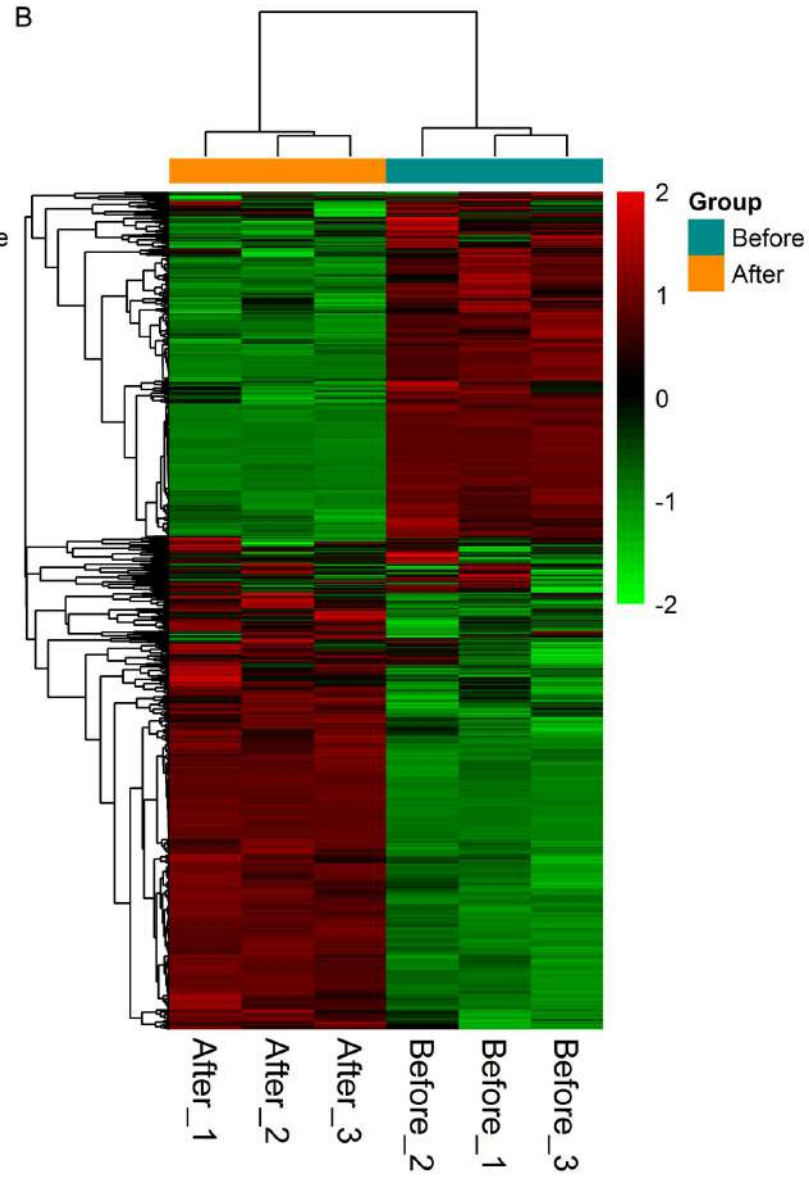

**A** Phosphoproteome genes Proteome genes

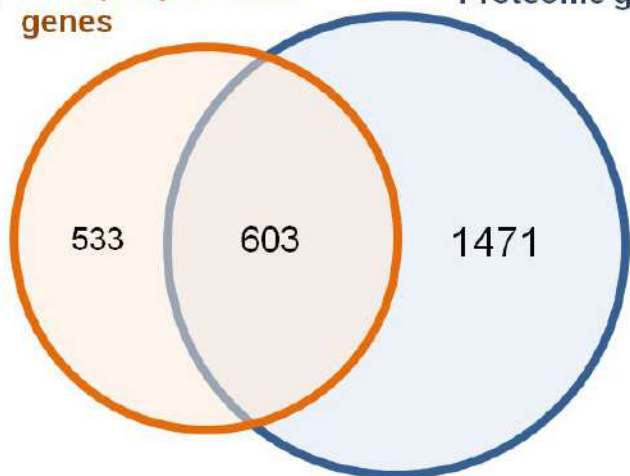

**B** Phosphoproteome DE genes Proteome DE genes

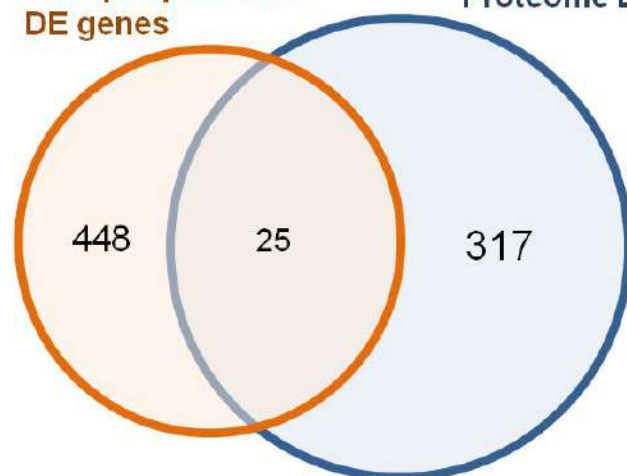

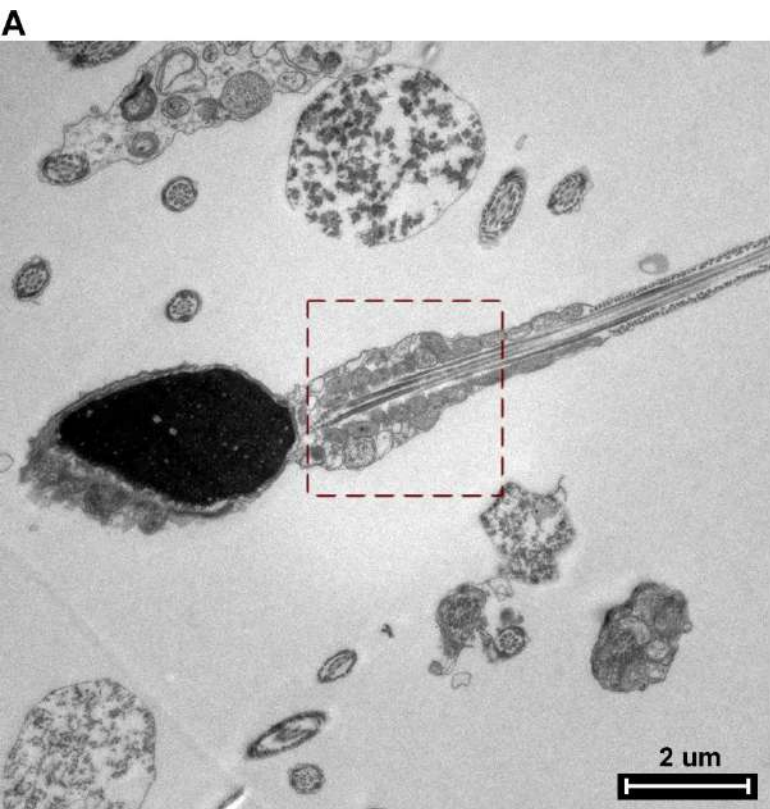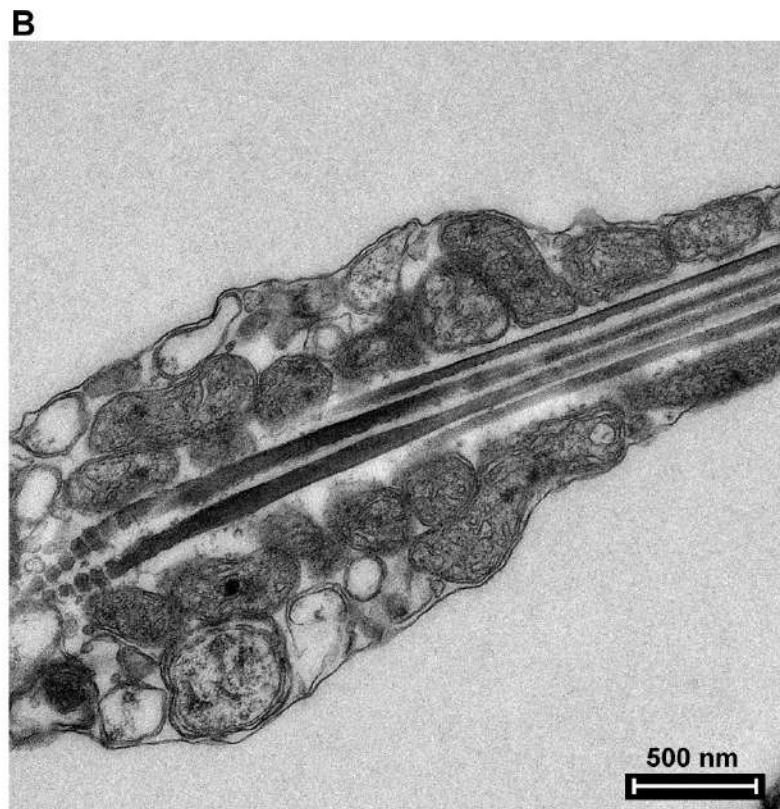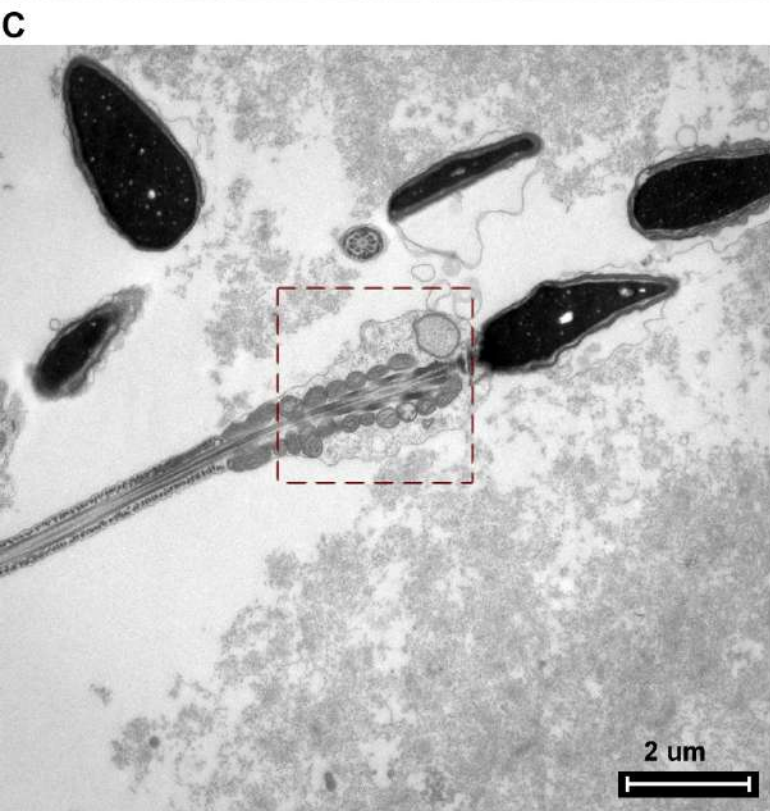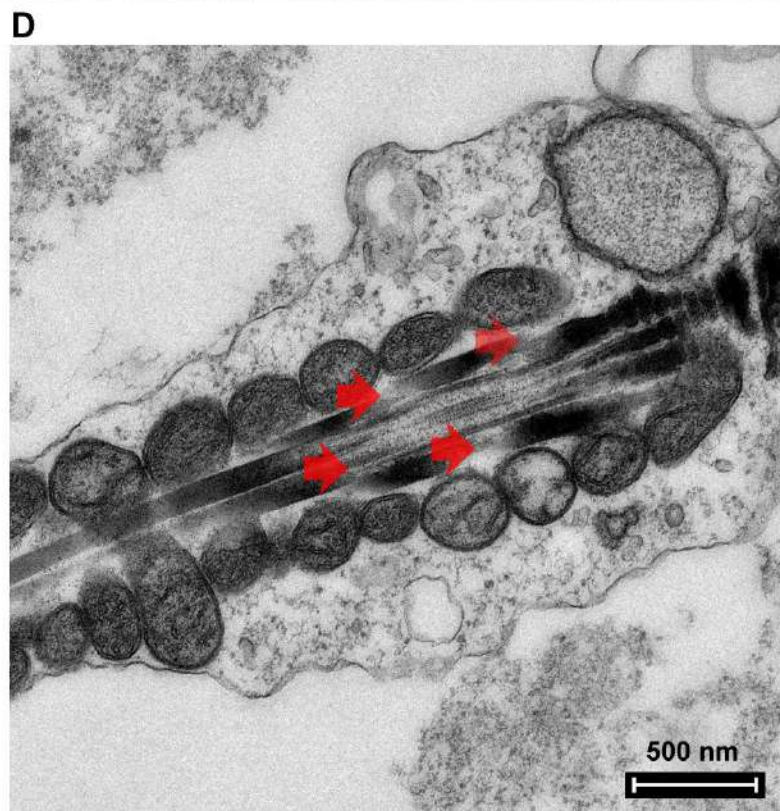

**Phosphoproteome DE genes:  
Abnormal sperm motility**

|         |          |          |
|---------|----------|----------|
| HMGB2   | CATSPER1 | HOATZ    |
| THEG    | STK33    | SLC26A8  |
| LRGUK   | PRKACA   | PSME4    |
| KCNU1   | CFAP44   | VPS13A   |
| ASPM    | PRM2     | TALDO1   |
| HSPA4L  | CFAP157  | DNAH8    |
| SPATA20 | ADAM7    | TPPP2    |
| DNAH1   | H1-7     | SPAG9    |
| LDHC    | LIPE     | CATSPER4 |
| GSK3A   | SPACA1   | TTC29    |
| SPEM1   | CCDC63   |          |

**36 genes**  
**Enrichment FDR: 5.20E-19**

**Proteome DE genes:  
Abnormal sperm motility**

|        |         |         |
|--------|---------|---------|
| AKAP4  | TEKT3   | GAPDHS  |
| GPX4   | MNS1    | CCDC136 |
| ODF2   | NUP210L | VDAC3   |
| ATP2B4 | ANO5    | SPATA6  |
|        | SMCP    | ODF1    |
|        | FAM170A | TEKT4   |
|        | TEKT2   | CAPZA3  |
|        | CADM1   |         |

**19 genes**  
**Enrichment FDR: 1.84E-06**
